# Supplementary material
Source: Springer Nature journal article supplement (https://www.springermedizin.de/resource/supplementary/12889_2008_1535_MOESM3_ESM.pdf/9503368)

**A.**

### Quantity of tablets per prescription

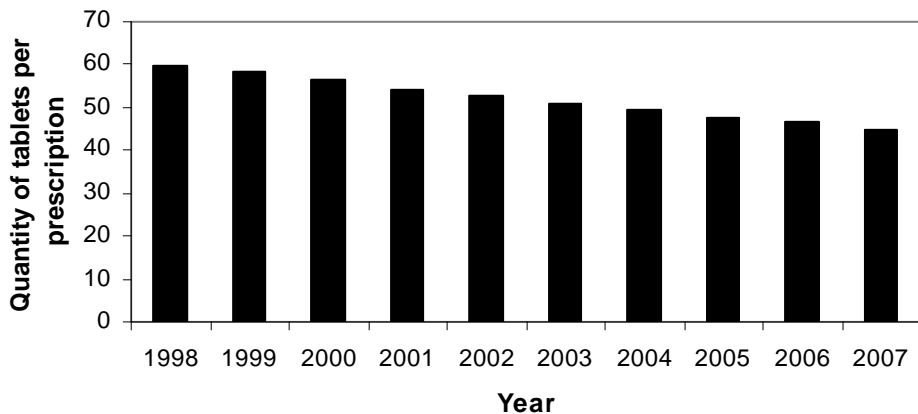

**B.**

### Length of prescription issued to patients

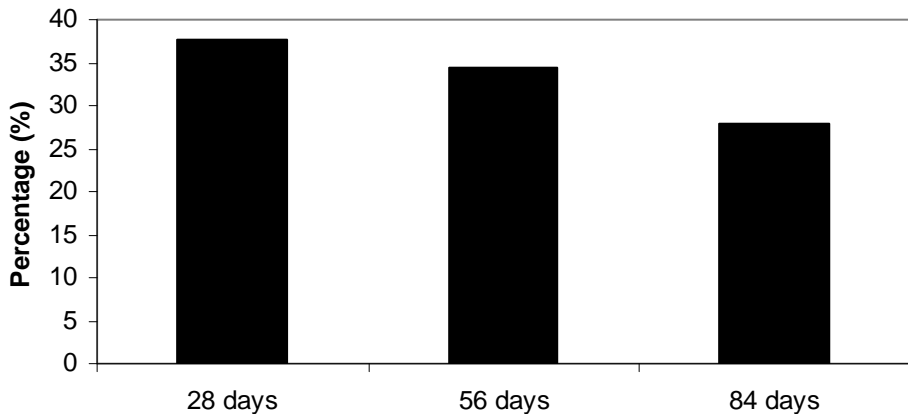

Supplement: MOESM3 [file 9503368]
